# Supplementary material
Source: PubMed Central journal article supplement (PMC7255436)
Supplement: NIHMS1587238-supplement-Supplementary_Figure_1.pdf [file NIHMS1587238-supplement-Supplementary_Figure_1.pdf]

## Control Lungs

Control 1

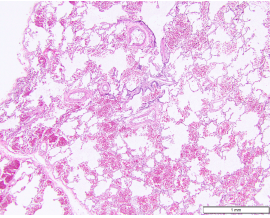

Control 2

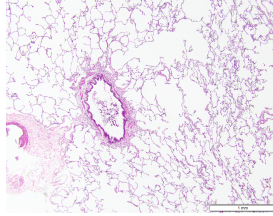

Control 3

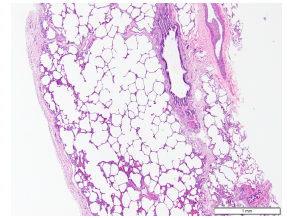

Control 4

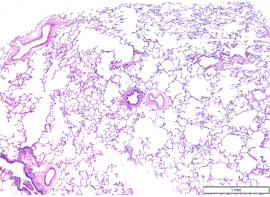

Control 5

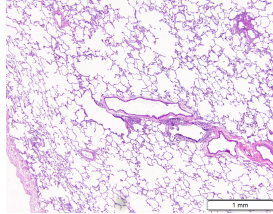

Control 6

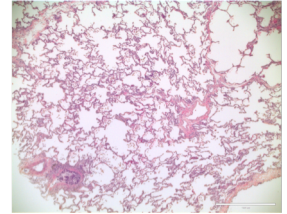

## Upper Lobe SSc Lungs

SSC 1

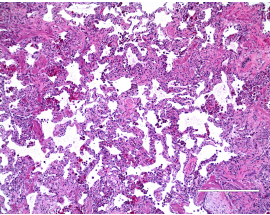

SSC 3

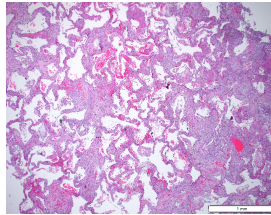

SSC 5

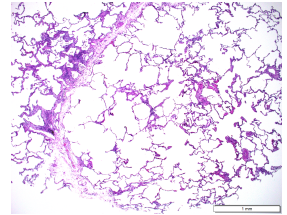

SSC 7

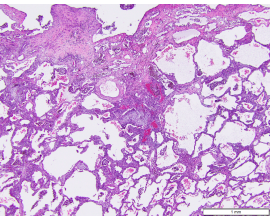

SSC 9

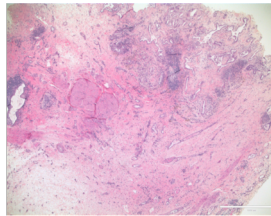

SSC 11

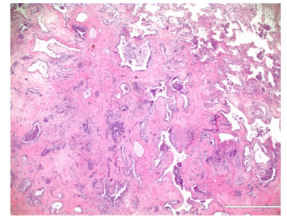

## Lower Lobe SSc Lungs

SSC 2

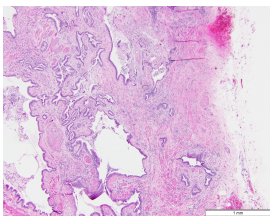

SSC 4

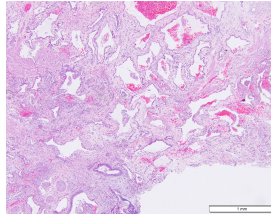

SSC 6

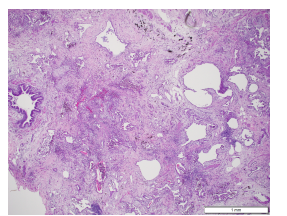

SSC 8

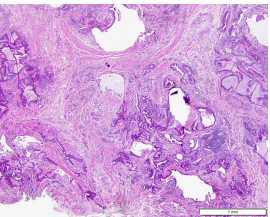

SSC 10

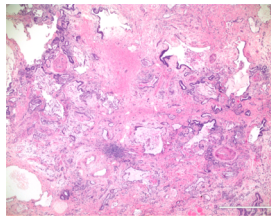

SSC 12

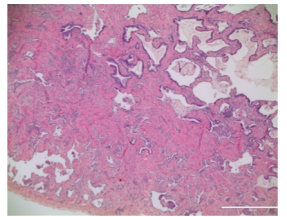

## **Supplemental Figure 1**

H&E stained histopathology of adjacent lung tissue sections from the explanted lungs used, identified by sample id. Scale bar=1mm for all included H&E sections. SSc, systemic sclerosis.
