# Supplementary material
Source: PubMed Central journal article supplement (PMC7255436)
Supplement: NIHMS1587238-supplement-Supplementary_Figure_2.pdf [file NIHMS1587238-supplement-Supplementary_Figure_2.pdf]

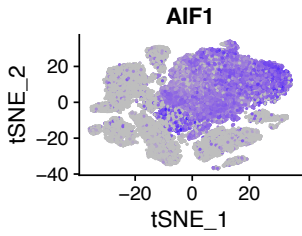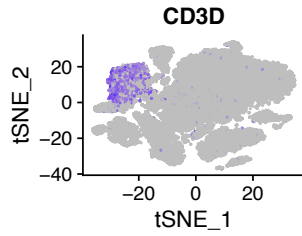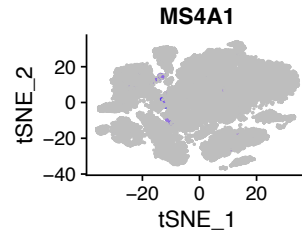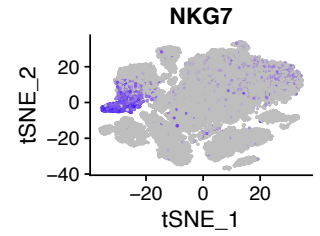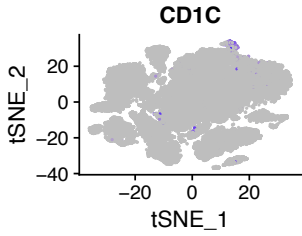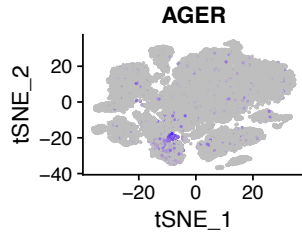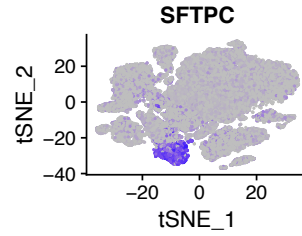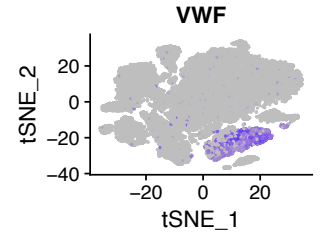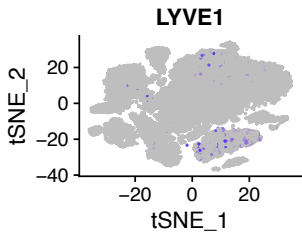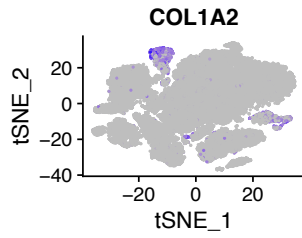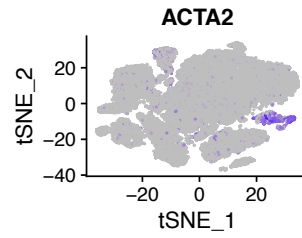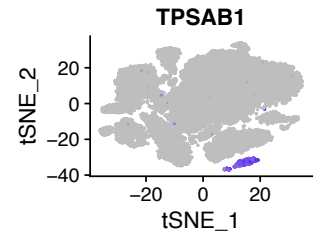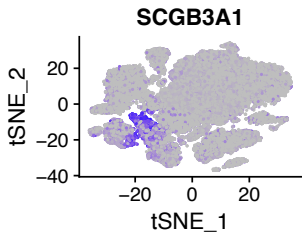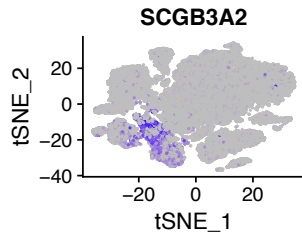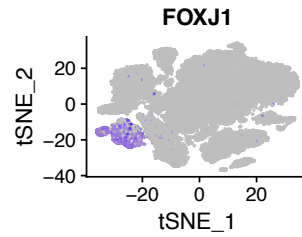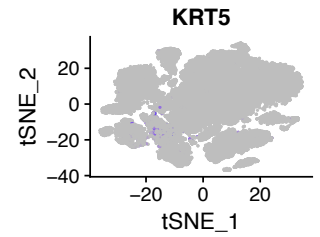

## Supplemental Figure 2

T-SNE plots demonstrating gene expression of selected canonical cell markers used in identifying cell identity of each cluster: *AIF1*- macrophages, *CD3D*- T lymphocytes, *MS4A1*- B lymphocytes, *NKG7*-natural killer cells, *CD1C*- dendritic cells, *AGER*- alveolar type 1 cells, *SFTPC*- alveolar type 2 cells, *VWF*- endothelial cells, *LYVE1*- lymphatic endothelial cells, *COL1A2*- fibroblasts, *ACTA2*- smooth muscle cells, *TPSAB1*- mast cells, *SCGB3A1*- goblet cells, *SCGB3A2*- club cells, *FOXJ1*- ciliated cells, *KRT5*- basal cells. Dot color corresponds to gene expression level in each cell. t-SNE, t-distributed stochastic neighbor embedding, SSc-ILD, systemic sclerosis-associated interstitial lung disease.
