# Supplementary material
Source: PubMed Central journal article supplement (PMC7255436)
Supplement: NIHMS1587238-supplement-Supplementary_Figure_3.pdf [file NIHMS1587238-supplement-Supplementary_Figure_3.pdf]

**A**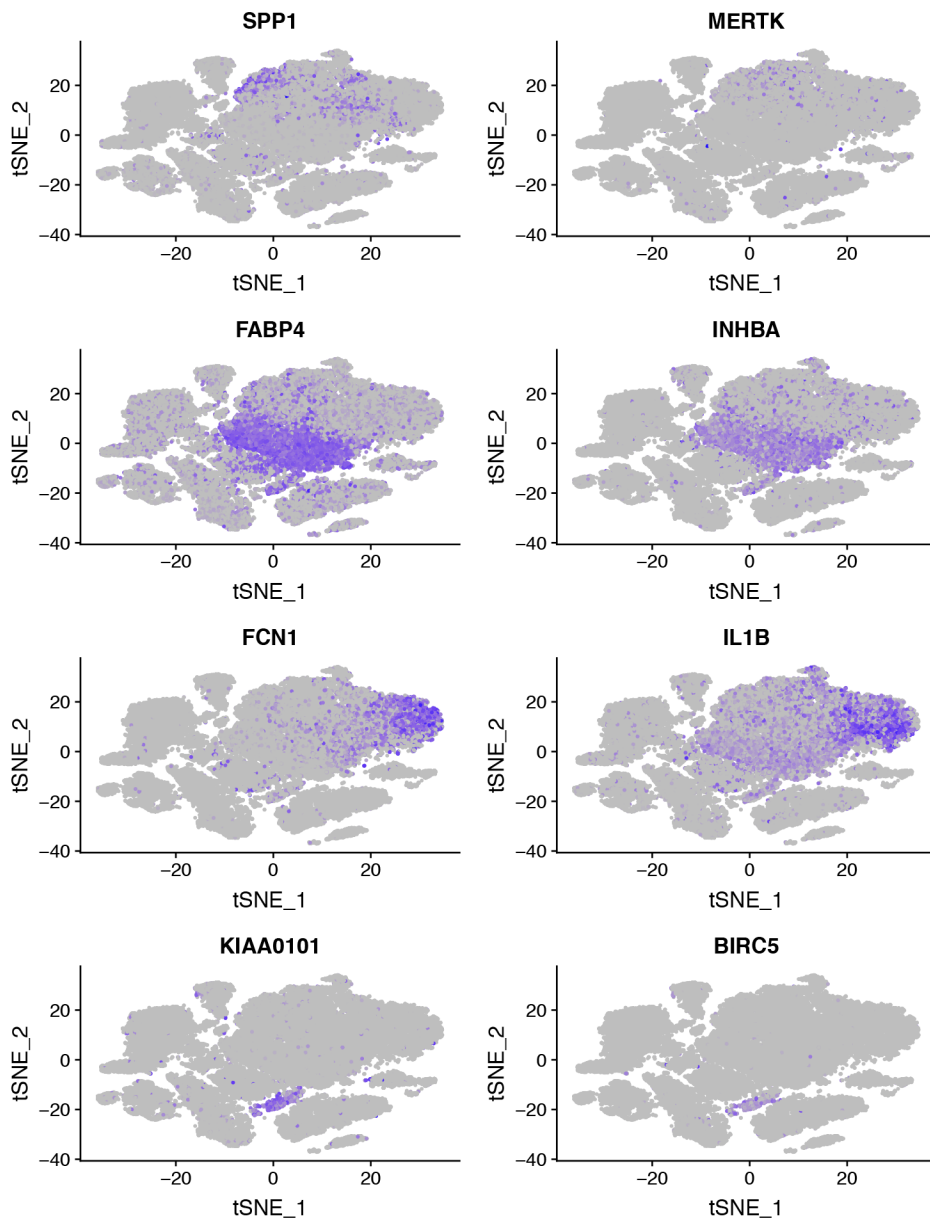**B**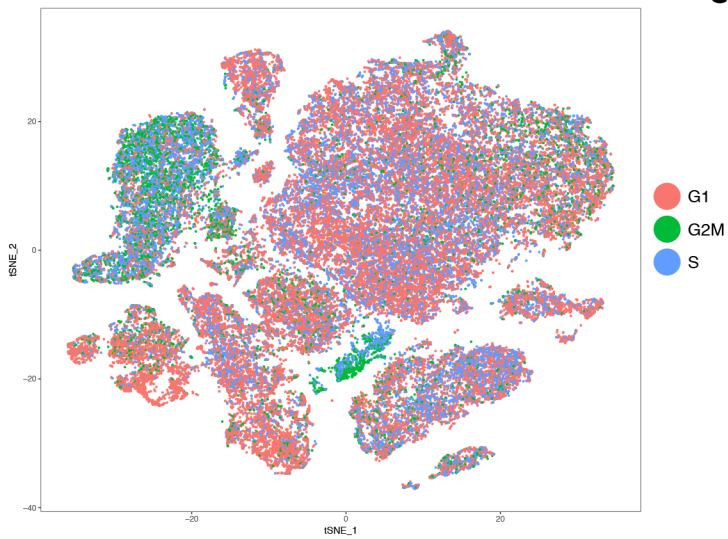**C**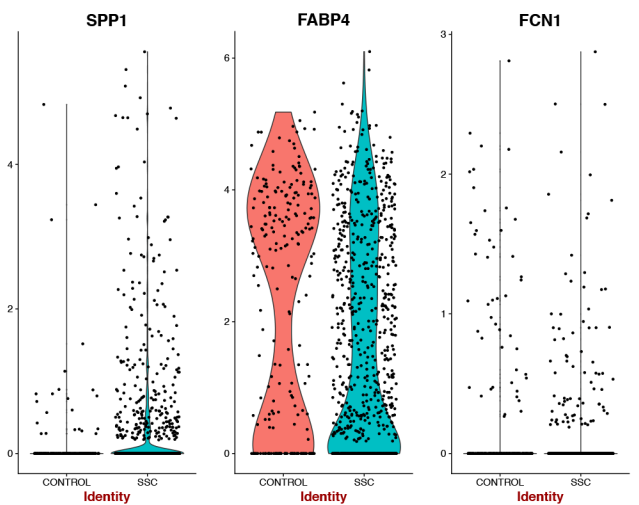

### Supplemental Figure 3

Macrophage and monocyte subpopulations in the combined analysis of healthy control and SSc-ILD samples. (A) Feature plots demonstrating gene expression of mononuclear phagocytic subpopulations: SPP1<sup>hi</sup> macrophage (*SPP1*, *MERTK*), FABP4<sup>hi</sup> macrophage (*FABP4*, *INHBA*), FCN1<sup>hi</sup> monocyte (*FCN1*, *IL1B*), proliferating macrophage (*KIAA0101*, *BIRC5*). Dot color corresponds to the gene expression level in each cell. (B) t-SNE plot of cells colored according to predicted cell phase, demonstrating an abundance of G2M and S phase in the original cluster 15, designated as proliferating cells. (C) Violin plots of gene expression of macrophage and monocyte subpopulation markers in the proliferating cell cluster (15) only, with cells separated by disease status. t-SNE, t-distributed stochastic neighbor embedding; SSc-ILD, systemic sclerosis-associated interstitial lung disease.
