# Supplementary material
Source: PubMed Central journal article supplement (PMC7255436)
Supplement: NIHMS1587238-supplement-Supplementary_Figure_4.pdf [file NIHMS1587238-supplement-Supplementary_Figure_4.pdf]

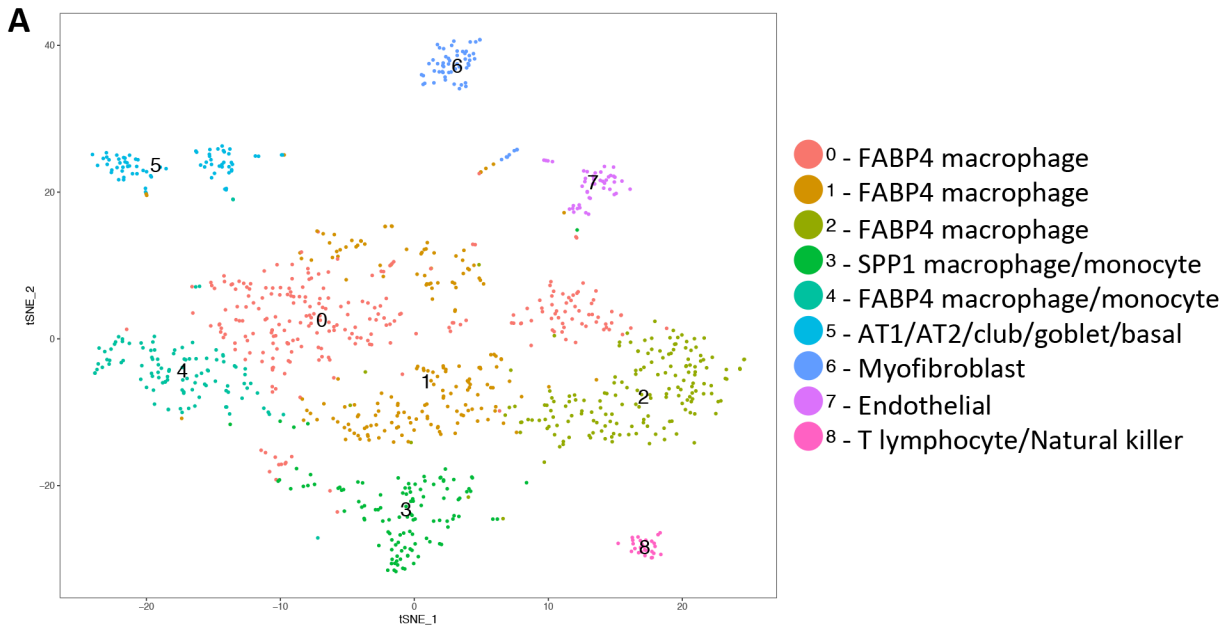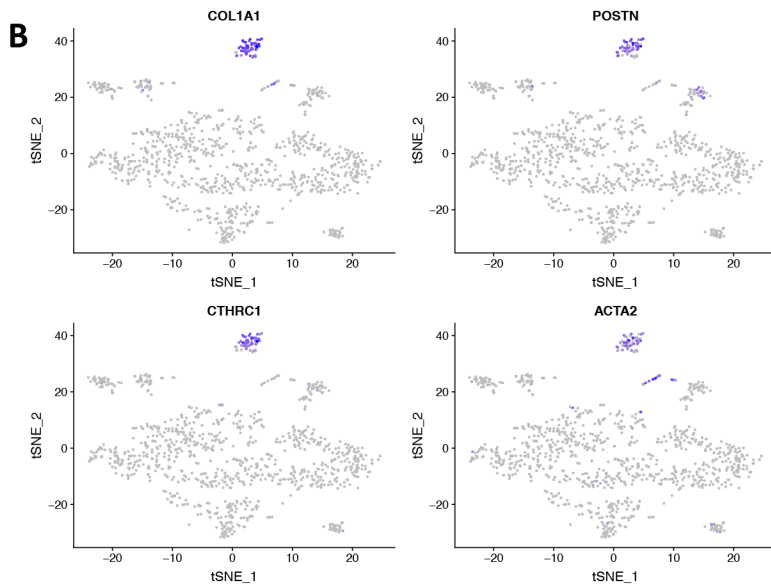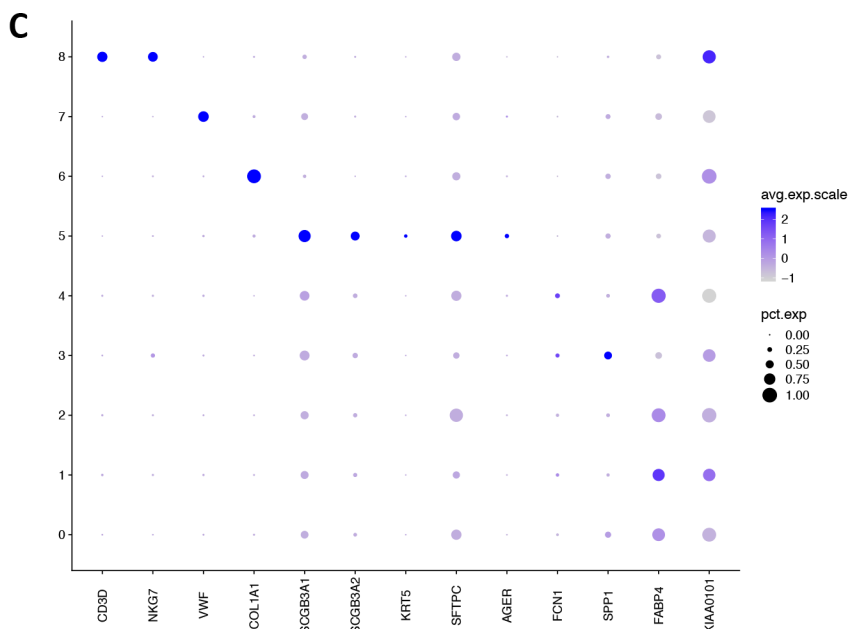

#### **Supplemental Figure 4**

Reclustering analysis of the original proliferating cell cluster (cluster 15) only. (A) t-SNE plot of reclustering only the proliferating cells, identified by cell type. (B) Feature plots of genes demonstrating cluster of myofibroblast proliferating cells. (C) Expression of selected cell type specific genes identifying the proliferating cell populations by clusters in Figure A. Y-axis numbers correspond to the clusters in Figure A. Dot size corresponds to the percentage of cells in each cluster expressing the gene, and dot color corresponds to the average expression level for the gene in the cluster.
