# Supplementary material
Source: PubMed Central journal article supplement (PMC7255436)
Supplement: NIHMS1587238-supplement-Supplementary_Figure_5.pdf [file NIHMS1587238-supplement-Supplementary_Figure_5.pdf]

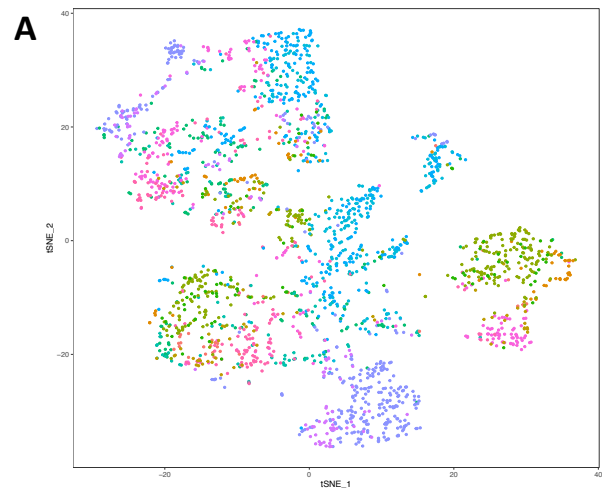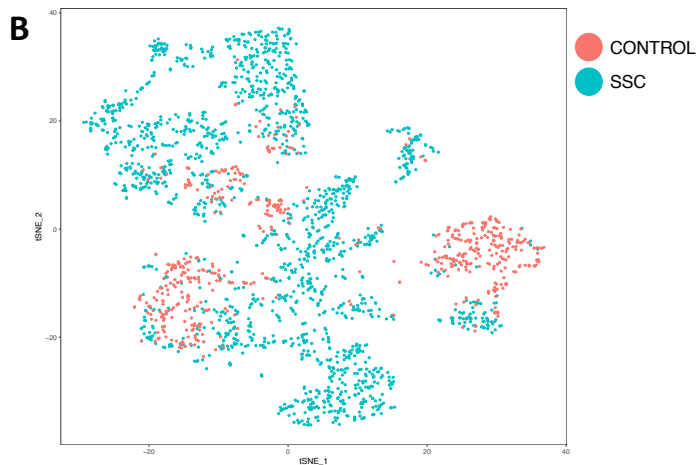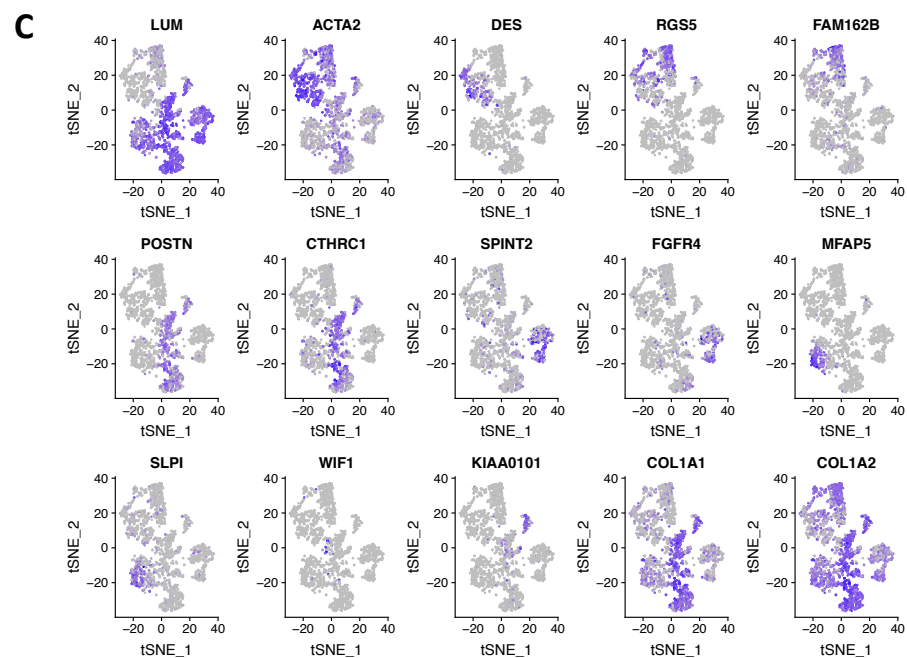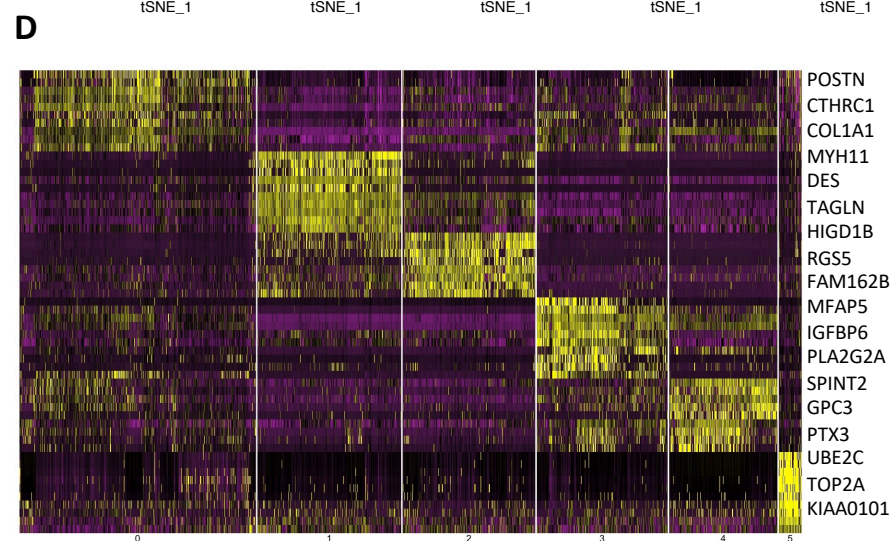

## Supplemental Figure 5

Single-cell RNA-sequencing of human healthy control and SSc-ILD mesenchymal cell populations. (A) t-SNE plot of mesenchymal cells colored according to sample of origin. (B) t-SNE plot of mesenchymal cell populations colored according to disease status. (C) Feature plots demonstrating gene expression of the identified mesenchymal cell types: all fibroblasts (*LUM*), smooth muscle (*DES*, *ACTA2*), pericytes (*RGS5*, *FAM162B*, *ACTA2*), myofibroblast (*ACTA2*, *POSTN*, *CTHRC1*), SPINT2<sup>hi</sup> fibroblast (*SPINT2*, *FGFR4*), MFAP5<sup>hi</sup> fibroblast (*MFAP5*, *SLPI*), WIF1<sup>hi</sup> fibroblast (*WIF1*), proliferating myofibroblast (*KIAA0101*, *POSTN*, *CTHRC1*, *ACTA2*). (D) Heat map of scaled gene expression data for the top 10 differentially expressed genes identifying each cluster (0-myofibroblast, 1-smooth muscle, 2-pericyte, 3-MFAP5<sup>hi</sup> fibroblast, 4-SPINT2<sup>hi</sup> fibroblast, 5- proliferating myofibroblast), with selected genes listed.
