# Supplementary material
Source: PubMed Central journal article supplement (PMC7255436)
Supplement: NIHMS1587238-supplement-Supplementary_Figure_6.pdf [file NIHMS1587238-supplement-Supplementary_Figure_6.pdf]

**A**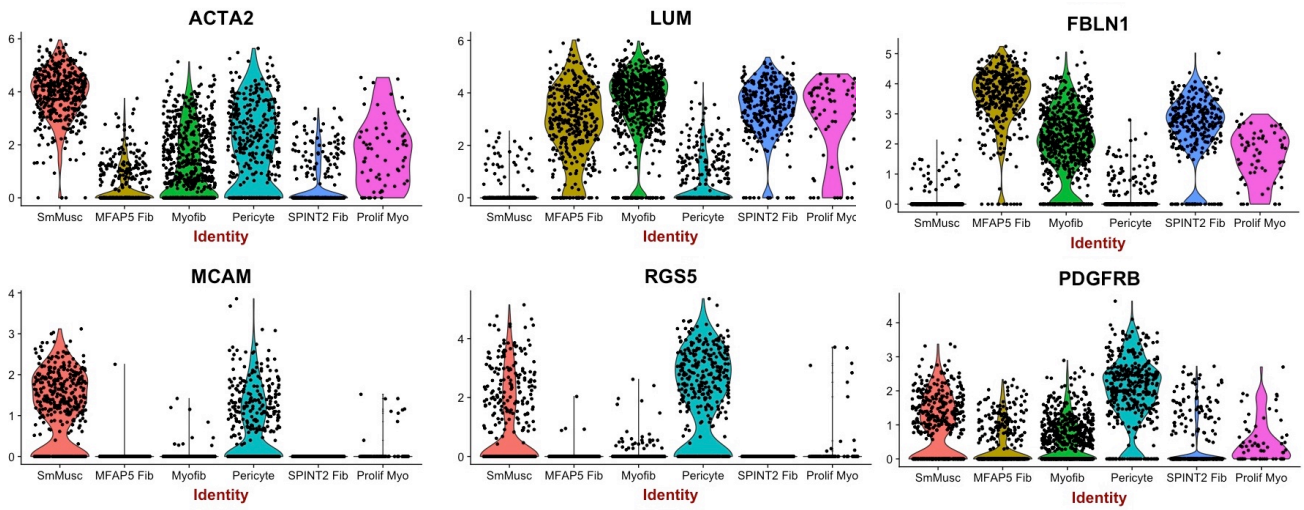**B**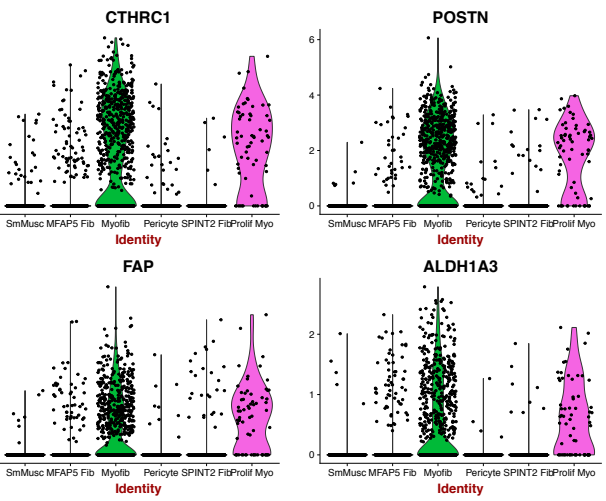**C**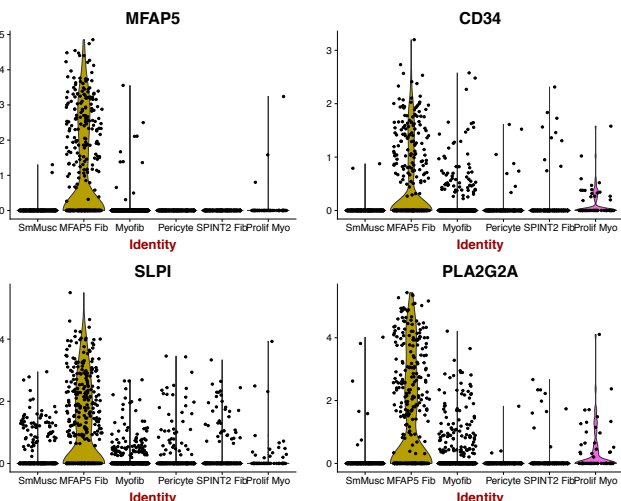**D**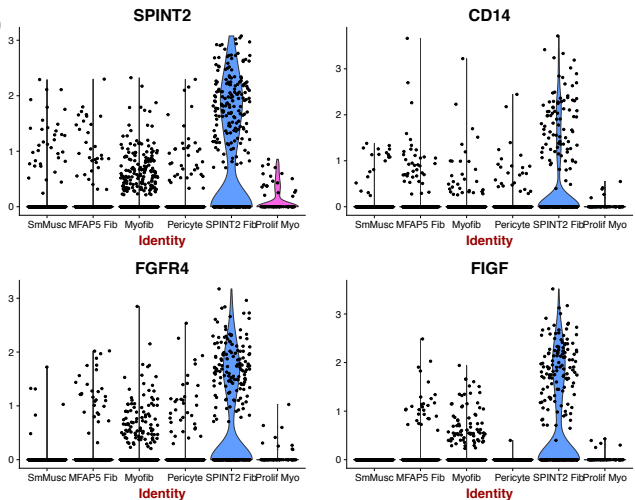

## Supplemental Figure 6

Single-cell RNA-sequencing of human healthy control and SSc-ILD mesenchymal cell populations. (A) Violin plots demonstrating gene expression of selected cell type markers in the combined healthy control and SSc-ILD analysis, divided by cell type. (B) Violin plots demonstrating marker genes of myofibroblasts. (C) Violin plots demonstrating marker genes of MFAP5<sup>hi</sup> fibroblasts. (D) Violin plots demonstrating marker genes of SPINT2<sup>hi</sup> fibroblasts.
