# Supplementary material
Source: PubMed Central journal article supplement (PMC7255436)
Supplement: NIHMS1587238-supplement-Supplementary_Figure_7.pdf [file NIHMS1587238-supplement-Supplementary_Figure_7.pdf]

**A**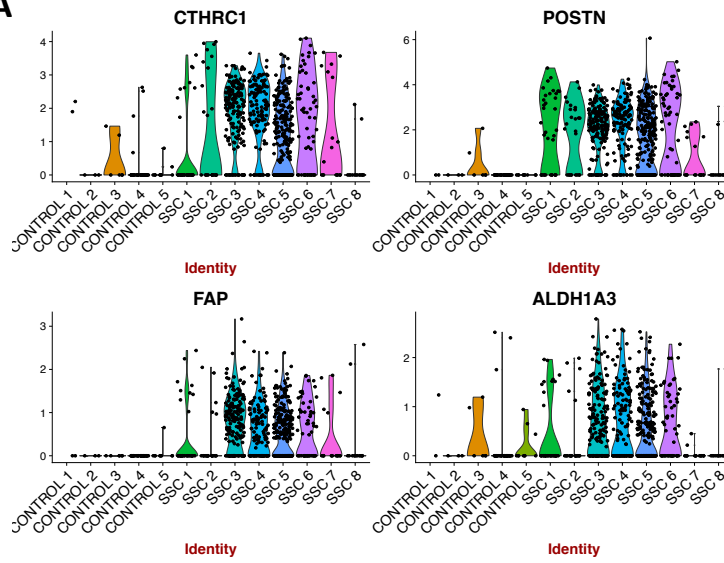**B**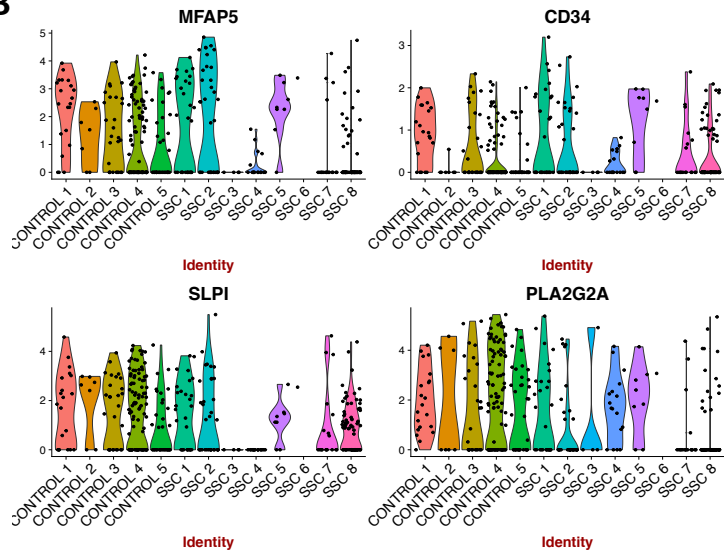**C**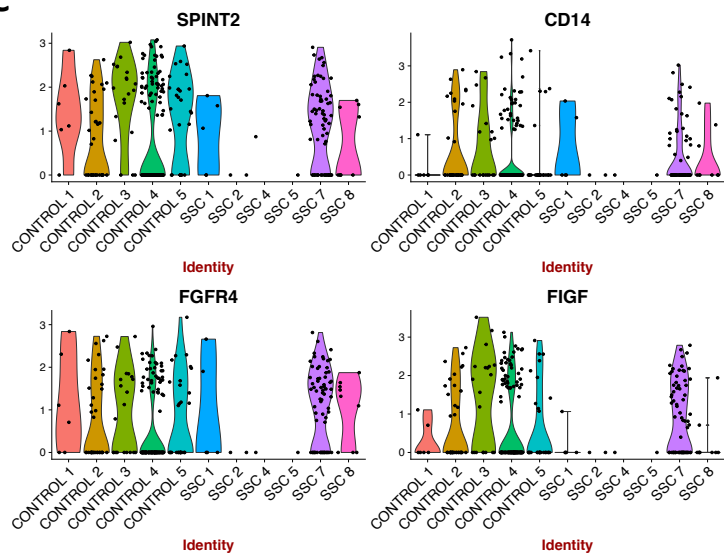

## Supplemental Figure 7

Violin plots of gene expression in human healthy control and SSc-ILD fibroblasts demonstrating intersample variability in fibroblast subpopulation marker genes. (A) Intersample variability in *CTHRC1*, *POSTN*, *FAP*, and *ALDH1A3* expression in the combined myofibroblast and proliferating myofibroblast cluster only. (B) Intersample variability in *MFAP5*, *CD34*, *SLPI*, and *PLA2G2A* expression in the MFAP5<sup>hi</sup> fibroblast cluster only. (C) Intersample variability in *SPINT2*, *CD14*, *FGFR4*, and *FIGF* in the SPINT2<sup>hi</sup> fibroblast cluster only.
